# Supplementary material
Source: Springer Nature journal article supplement (https://www.springermedizin.de/resource/supplementary/12874_2006_210_MOESM2_ESM.pdf/9433996)
Supplement: MOESM2 [file 9433996]

**Table B - Estimated odds ratios for extreme responses and for more positive responses among telephone respondents**

| Item                                                     | Estimated odds ratios |                         | p-value <sup>§</sup> |
|----------------------------------------------------------|-----------------------|-------------------------|----------------------|
|                                                          | Extreme responses     | More positive reporting |                      |
| <i>Medicine</i>                                          |                       |                         |                      |
| Painkillers <sup>*†</sup>                                | 0.97                  | 0.89                    | 0.16                 |
| Sedatives <sup>*</sup>                                   | 1.67                  | 1.18                    | 0.50                 |
| Sleeping medicine <sup>*</sup>                           | 0.87                  | 1.05                    | 0.77                 |
| <i>Smoking habits</i>                                    |                       |                         |                      |
| Smoking daily <sup>*</sup>                               | 1.12                  | 0.97                    | 0.54                 |
| <i>Self-esteem</i>                                       |                       |                         |                      |
| I can cope with most situations in life                  | 1.97                  | 1.92                    | <0.0001              |
| No clear direction or purpose in life <sup>*</sup>       | 1.05                  | 0.87                    | <0.0001              |
| Not able to influence my future <sup>*</sup>             | 1.18                  | 0.88                    | <0.0001              |
| What I do in my daily life is meaningful                 | 2.57                  | 2.97                    | <0.0001              |
| Things happen that I do not understand <sup>*</sup>      | 1.07                  | 0.70                    | <0.0001              |
| I have a great deal to live for                          | 2.00                  | 2.05                    | <0.0001              |
| Know what I ought to do, but not able to <sup>*</sup>    | 1.26                  | 0.98                    | <0.0001              |
| Difficult to see how pieces in life connect <sup>*</sup> | 0.96                  | 0.94                    | 0.006                |
| Understand most of my everyday life                      | 1.88                  | 1.90                    | <0.0001              |
| <i>Well-being</i>                                        |                       |                         |                      |
| Health in general                                        | 1.76                  | 1.39                    | <0.0001              |
| Health compared to one year ago                          | 0.93                  | 0.99                    | 0.90                 |
| Sick a little easier than other people <sup>*†</sup>     | 0.81                  | 0.79                    | 0.13                 |
| As healthy as anybody I know <sup>†</sup>                | 1.48                  | 1.54                    | <0.0001              |
| Expect health to get worse <sup>*†</sup>                 | 1.55                  | 1.63                    | <0.0001              |
| Excellent health <sup>†</sup>                            | 1.83                  | 1.79                    | <0.0001              |
| Not had the time to relax or enjoy myself <sup>*</sup>   | 1.13                  | 0.75                    | <0.0001              |
| Calm and peaceful                                        | 1.52                  | 1.56                    | <0.0001              |
| Having a lot of energy                                   | 1.24                  | 1.76                    | <0.0001              |
| A happy person                                           | 1.79                  | 2.01                    | <0.0001              |
| Tired <sup>*</sup>                                       | 2.20                  | 1.31                    | <0.0001              |
| <i>Depression</i>                                        |                       |                         |                      |
| Been withdrawn <sup>*</sup>                              | 1.64                  | 1.45                    | <0.0001              |
| Not able to deal with other people <sup>*</sup>          | 2.12                  | 1.74                    | <0.0001              |
| Found it difficult to be happy <sup>*</sup>              | 2.21                  | 1.82                    | <0.0001              |
| Have eaten for comfort <sup>*</sup>                      | 1.57                  | 1.52                    | 0.002                |
| Nothing could cheer me up <sup>*</sup>                   | 1.42                  | 1.41                    | 0.005                |
| Downhearted and blue <sup>*</sup>                        | 1.33                  | 1.21                    | 0.01                 |
| <i>Stress</i>                                            |                       |                         |                      |
| Have been a bit touchy <sup>*</sup>                      | 1.53                  | 1.08                    | <0.0001              |
| Have lacked initiative <sup>*</sup>                      | 2.18                  | 1.82                    | <0.0001              |
| Have felt harassed <sup>*</sup>                          | 1.11                  | 0.73                    | <0.0001              |
| Feeling full of pep                                      | 1.31                  | 1.72                    | <0.0001              |
| A very nervous person <sup>*</sup>                       | 1.66                  | 1.53                    | <0.0001              |
| Have had a tight chest or chest pains <sup>*</sup>       | 1.47                  | 1.44                    | 0.006                |
| Have had palpitations <sup>*</sup>                       | 1.64                  | 1.60                    | 0.0001               |

|                                                       |      |      |         |
|-------------------------------------------------------|------|------|---------|
| Have been short of breath <sup>*</sup>                | 2.25 | 2.01 | <0.0001 |
| Have been dizzy <sup>*</sup>                          | 1.94 | 1.91 | <0.0001 |
| Have had tension in various muscles <sup>*</sup>      | 1.67 | 1.21 | <0.0001 |
| Have had a tendency to sweat <sup>*</sup>             | 2.44 | 2.27 | <0.0001 |
| Have had problems concentrating <sup>*</sup>          | 1.73 | 1.64 | <0.0001 |
| Have had difficulty in taking decisions <sup>*</sup>  | 1.58 | 1.51 | <0.0001 |
| Have had difficulty with remembering <sup>*</sup>     | 1.28 | 1.26 | 0.05    |
| Have found it difficult to think clearly <sup>*</sup> | 1.36 | 1.40 | 0.002   |

<sup>\*</sup> Questions were reversed (either by negation or by using negatively loaded terms)

<sup>†</sup> "Don't know" responses were treated as missing values

<sup>‡</sup> Variable partly corrupted; the middle categories "one or several times a week" and "one or several times a month" were combined in the analyses.

<sup>§</sup> Chi-square test for identical distributions on the complete scale
